# Supplementary material for: Phylogenetic relationships and biogeography of the genus Algansea Girard (Cypriniformes: Cyprinidae) of central Mexico inferred from molecular data
Source: PubMed Central journal article supplement (PMC2759940; doi:10.1186/1471-2148-9-223), 2009-09-07
Supplement: 1471-2148-9-223-S1.pdf [file 1471-2148-9-223-S1.pdf]

| <i>Species</i>                                                                             | <i>Locality/ Drainage</i>                                                         | <i>Tissue/Voucher</i>                                    | <i>Genbank accession number</i> |           |
|--------------------------------------------------------------------------------------------|-----------------------------------------------------------------------------------|----------------------------------------------------------|---------------------------------|-----------|
|                                                                                            |                                                                                   |                                                          | <i>Cyt b</i>                    | <i>S7</i> |
| <i>Algansea amecae</i>                                                                     | 1. Stream at Coronilla town, Ameca drainage, Jalisco, Mexico                      | GenBank                                                  | DQ324091                        | --        |
|                                                                                            |                                                                                   | CPUMDNA 1203                                             | FJ913811                        | FJ913830  |
| <i>Algansea aphanea</i>                                                                    | 2. Ayutla River, Armería-Ayuquila system Jalisco, México*                         | MNCN 3658                                                | FJ913812                        |           |
|                                                                                            |                                                                                   | CPUMDNA 28                                               | FJ913770                        | FJ913817  |
|                                                                                            |                                                                                   | CPUMDNA 29                                               | FJ913771                        | FJ913818  |
|                                                                                            | 3. El Tule River, Tamazula-Coahuayana system, Jalisco, México                     | CPUMDNA 30                                               | FJ913772                        | --        |
|                                                                                            |                                                                                   | CPUMDNA 1267                                             | FJ913773                        | --        |
|                                                                                            |                                                                                   | CPUMDNA 1268                                             | FJ913774                        | FJ913819  |
| <i>Algansea avia</i>                                                                       | 4. River road to Santa María del Oro, Santiago River drainage, Nayarit, México    | CPUMDNA 1269                                             | FJ913775                        | --        |
|                                                                                            |                                                                                   | CPUMDNA 4075                                             | FJ913776                        | --        |
|                                                                                            |                                                                                   | CPUMDNA 4076                                             | FJ913777                        | FJ913820  |
|                                                                                            | 5. Compostela River, Compostela River drainage, Nayarit, México                   | CPUMDNA 4077                                             | FJ913778                        | FJ913821  |
|                                                                                            |                                                                                   | MNCN 150                                                 | FJ913779                        | --        |
| <i>Algansea barbata</i>                                                                    | 6. Sila River, high-Lerma, Estado de México, México                               | CPUMDNA 93                                               | FJ913780                        | --        |
|                                                                                            | <i>Algansea lacustris</i>                                                         | 7. Pátzcuaro Lake, interior drainage, Michoacán, México* | CPUMDNA 94                      | FJ913781  |
|                                                                                            |                                                                                   |                                                          | CPUMDNA 1278                    | FJ913782  |
|                                                                                            | 8. San Gregorio Lake, Santa Clara del Cobre, interior drainage Michoacán, México. | CPUMDNA 614                                              | FJ913783                        | FJ913824  |
|                                                                                            |                                                                                   | CPUMDNA 615                                              | FJ913784                        | --        |
|                                                                                            | 8. San Gregorio Lake, Santa Clara del Cobre, interior drainage Michoacán, México. | GenBank                                                  | DQ324088                        | --        |
|                                                                                            |                                                                                   | CPUMDNA 21                                               | FJ913785                        | --        |
|                                                                                            |                                                                                   | MNCM 4065                                                | FJ913786                        | --        |
| <i>Algansea monticola</i>                                                                  | 9. San Jose stream, Bolaños- Santiago system, Jalisco, México.                    | CPUMDNA 848                                              | FJ913787                        | FJ913825  |
|                                                                                            | 10. Huejuquilla River, Bolaños-Santiago system, Jalisco, México                   | CPUMDNA 849                                              | FJ913788                        | --        |
| <i>Algansea tincella</i>                                                                   | 11. Tesoreros Dam, Bolaños-Santiago system, Jalisco, México                       | CPUMDNA 850                                              | FJ913789                        | --        |
|                                                                                            |                                                                                   | CPUMDNA 869                                              | FJ913790                        | --        |
|                                                                                            | 12. Umequaro River, Cuitzeo basin, Michoacán, México                              | CPUMDNA 1215                                             | FJ913791                        | --        |
|                                                                                            |                                                                                   | CPUMDNA 1216                                             | FJ913792                        | --        |
|                                                                                            |                                                                                   | CPUMDNA 1217                                             | FJ913793                        | FJ913826  |
|                                                                                            |                                                                                   | CPUMDNA 1218                                             | FJ913794                        | --        |
|                                                                                            |                                                                                   | CPUMDNA 1219                                             | FJ913795                        | --        |
|                                                                                            | 13. Orandino Dam, Michoacán, México                                               | GenBank                                                  | DQ324089                        | --        |
|                                                                                            | 14. Laguna de Zacapu, Angulo river, Michoacán, México                             | GenBank                                                  | DQ324090                        | --        |
|                                                                                            | 15. del Carmén Dam, middle Lerma, Querétaro, México                               | GenBank                                                  | DQ324092                        | --        |
|                                                                                            | 16. la Paz Dam, Verde-Santiago system, Jalisco, México                            | CPUMDNA 842                                              | FJ913796                        | FJ913827  |
|                                                                                            |                                                                                   | CPUMDNA 4212                                             | FJ913797                        | --        |
|                                                                                            | 17. Stream at Guadalupe Victoria town, Verde-Santiago system, Jalisco, México     | CPUMDNA 856                                              | FJ913798                        | --        |
| CPUMDNA 858                                                                                |                                                                                   | FJ913799                                                 | --                              |           |
| CPUMDNA 859                                                                                |                                                                                   | FJ913800                                                 | --                              |           |
| CPUMDNA 860                                                                                |                                                                                   | FJ913801                                                 | --                              |           |
| 18. Stream at Matanzas town, Verde-Santiago system, Jalisco, México                        | CPUMDNA 860                                                                       | FJ913801                                                 | --                              |           |
|                                                                                            | CPUMDNA 852                                                                       | FJ913802                                                 | --                              |           |
| 19. Tecolote River, Verde-Santiago system, Zacatecas                                       | CPUMDNA 407                                                                       | FJ913803                                                 | --                              |           |
|                                                                                            | CPUMDNA 964                                                                       | FJ913804                                                 | --                              |           |
|                                                                                            | CPUMDNA 965                                                                       | FJ913805                                                 | --                              |           |
| 20. Stream at Jesús María town, Santa María del Río-Pánuco system, San Luís Potosí, México | CPUMDNA 718                                                                       | FJ913806                                                 | --                              |           |
|                                                                                            | CPUMDNA 719                                                                       | FJ913807                                                 | FJ913835                        |           |
|                                                                                            | CPUMDNA 720                                                                       | FJ913808                                                 | --                              |           |
|                                                                                            | CPUMDNA 1314                                                                      | FJ913809                                                 | --                              |           |
| 21. Quitupan River, Tepalcatepec-Balsas system, Michoacán, México                          | CPUMDNA 1315                                                                      | FJ913810                                                 | FJ913828                        |           |
|                                                                                            | CPUMDNA 1854                                                                      | FJ913813                                                 | FJ913831                        |           |
| <i>Agosia chrysogaster</i>                                                                 | 22. Sonora River, Sonora drainage, Sonora, México                                 | CPUMDNA 1926                                             | FJ913814                        | FJ913832  |
| <i>Campostoma ornatum</i>                                                                  | 23. Primero River, Conchos drainage, Chihuahua, México                            | CPUMDNA 1941                                             | FJ913815                        | FJ913833  |
| <i>Dionda</i> sp.                                                                          | 24. Nazas River, Nazas-Aguanaval system, Durango, México                          | CPUMDNA 1868                                             | FJ913816                        | FJ913834  |
| <i>Gila robusta</i>                                                                        | 25. Batopilas River, Fuerte drainage, Chihuahua, México                           |                                                          |                                 |           |
