# Supplementary material for: Phylogenetic relationships and biogeography of the genus Algansea Girard (Cypriniformes: Cyprinidae) of central Mexico inferred from molecular data
Source: PubMed Central journal article supplement (PMC2759940; doi:10.1186/1471-2148-9-223), 2009-09-07
Supplement: 1471-2148-9-223-S2.pdf [file 1471-2148-9-223-S2.pdf]

| <i>Character</i>            | <i>A. aphanea</i>              | <i>A. avia</i>   | <i>A. monticola</i> | <i>A. barbata</i>                   | <i>A. amecae</i>       | <i>A. tincella</i>     | <i>A. lacustris</i>    | <i>Agosia chrysogaster</i> |
|-----------------------------|--------------------------------|------------------|---------------------|-------------------------------------|------------------------|------------------------|------------------------|----------------------------|
| 1. Orientation of mouth     | subterminal                    | terminal         | terminal            | subterminal                         | terminal               | terminal               | upturned               | upturned <sup>o</sup>      |
| 2. Maxillary barbels        | present                        | present          | present             | present                             | absent                 | absent                 | absent                 | present <sup>o</sup>       |
| 3. Gill rakers              | 5-11                           | 5-11             | 5-11                | 5-11                                | 9-25                   | 9-25                   | 9-25                   | 5-11                       |
| 4. Supraethmoid margin      | rounded                        | 1 U-shaped notch | 1 U-shaped notch    | 1 U-shaped notch                    | 3 U-shaped notch       | 3 U-shaped notch       | 3U-shaped notch        | ?                          |
| 5. Epiotic bones            | absent or obsolete             | poorly developed | poorly developed    | Poorly developed                    | prominent              | prominent              | prominent              | ?                          |
| 6. Supraethmoid orientation | tilted sharply anteroventrally | horizontal       | Horizontal          | tilted sharply anteroventrally      | horizontal             | horizontal             | horizontal             | ?                          |
| 7. Standard length          | <100 ml                        | <100 ml          | <100 ml             | >100 ml                             | >100 ml                | >100 ml                | >100 ml                | <100 ml <sup>+</sup>       |
| 8. Gut flexure              | simple loop                    | simple loop      | simple loop         | simple loop with median part flexed | counter-clock flexured | counter-clock flexured | counter-clock flexured | simple loop*               |
| 9. Neurocranium dome        | flatened                       | flatened         | flatened            | rounded                             | rounded                | rounded                | rounded                | ?                          |

\* = Cavender & Coburn (1991)

<sup>o</sup> = Page & Burr (1991a)

<sup>+</sup> = Page & Burr (1991b)
